1 **i. Title:** GLOBAL LAND-USE AND LAND-COVER DATA: HISTORICAL, CURRENT  
2 AND FUTURE SCENARIOS

3  
4 **ii. Running title:** GLOBAL LULC DATA

5  
6 **iii. Authors:** MARIANA M. VALE<sup>1,2,3</sup>, MATHEUS S. LIMA-RIBEIRO<sup>3,4</sup> AND TAINÁ C. ROCHA<sup>3,5</sup>

7 \*

8  
9 **iv: Author affiliations:**

10 <sup>1</sup> Ecology Department, Federal University of Rio de Janeiro, Brazil

11 <sup>2</sup> Brazilian Research Network on Global Climate Change (Rede Clima), São José dos  
12 Campos, Brazil

13 <sup>3</sup> National Institute of Science and Technology on Ecology, Evolution and Biodiversity  
14 Conservation (INCT EECBio), Federal University of Goiás, Goiânia, Brazil

15 <sup>4</sup> Biodiversity Department, Federal University of Jataí (UFJ), Goiás, Brazil

16 <sup>5</sup> Botanical Garden Research Institute of Rio de Janeiro, Rio de Janeiro, Brazil.

17  
18 **v. Corresponding Authors contact details:** taina013@gmail.com

19  
20 **vi. Author contributions:** MV and TR designed the study, TR carried out the analyses, MV, TR and  
21 ML-R wrote the paper.

22  
23 **vii. Acknowledgements:**

24 This initiative was possible due to the high-quality data that is maintained and made publicly  
25 available by Land-Use Harmonization (<https://luh.umd.edu/>). We are grateful to Ritvik Sahajpa for  
26 helping in the early stages of data acquisition and transformation. This study was developed in the  
27 context of the National Institute for Science and Technology in Ecology, Evolution and  
28 Conservation of Biodiversity (INCT EECBio, CNPq Grant n 465610|2014-5, FAPEG  
29 201810267000023) and the Brazilian Network on Global Climate Change Research (Rede  
30 CLIMA). MMV and ML-R received support from the National Council for Scientific and  
31 Technological Development (CNPq Grants no. 304309/2018-4 and 301514/2019-4, respectively)  
32 and TR from CAPES (Coordination for the Improvement of Higher Education Personnel - Grant  
33 No. 88887.373031/2019-00) and Open Life Science (OLS-2).

34  
35 **viii. Data accessibility:**

36 All files will be made freely available online in ecoClimate database: <https://www.ecoclimate.org/>

37  
38 **ix. Conflict of interest**

39 The authors have declared that no competing interests exist.

40

## 41 **Abstract:**

42 Land-use land-cover (LULC) data are important predictors of species occurrence and biodiversity  
43 threat. Although there are LULC datasets available under current conditions, there is a lack of such  
44 data under historical and future climatic conditions. This hinders, for example, projecting niche and  
45 distribution models under global change scenarios at different time scenarios. The Land Use  
46 Harmonization Project (LUH2) is a global terrestrial dataset at 0.25° spatial resolution that provides  
47 LULC data from 850 to 2300 for 12 LULC state classes. The dataset, however, is compressed in a  
48 file format (NetCDF) that is incompatible for many analyses and requires layer extractions and  
49 transformations that are intractable for most researchers. Here we selected and transformed the  
50 LUH2 in a standard GIS format data to make it more user-friendly. We provide LULC for every  
51 year from 850 to 2100, and from 2015 on, the LULC dataset is provided under two Shared  
52 Socioeconomic Pathways (SSP2-4.5 and SSP5-8.5). We provide two types of files for each year:  
53 separate files with continuous values for each of the 12 LULC state classes, and a single categorical  
54 file with all state classes combined. To create the categorical layer, we assigned the state with the  
55 highest value in a given pixel among the 12 continuous data. LUH2 predicts a pronounced decrease  
56 in primary forest, particularly noticeable in the Amazon, the Brazilian Atlantic Forest, the Congo  
57 Basin and the boreal forests, an equally pronounced increase in secondary forest and non-forest  
58 lands, and in croplands in the Brazilian Atlantic Forest and sub-Saharan Africa. The final dataset  
59 provides LULC data for 1251 years that will be of interest for macroecology, ecological niche  
60 modeling, global change analysis, and other applications in ecology and conservation.  
61 **keywords:** Conservation biogeography, ecological niche modelling, macroecology, CMIP6, climate  
62 change, deforestation  
63

64

## INTRODUCTION

65 Land-use and land-cover (LULC) change has been one of the main drivers of environmental  
66 change at multiple scales and is currently recognized as an important predictor of anthropogenic  
67 impacts and biodiversity threats (Maxwell et al. 2016; Prestele et al. 2016; Gomes et al. 2020;  
68 2021; Rosa et al. 2021). Mapping land-use land-cover (LULC) changes through time is, therefore,  
69 important and desirable to predict these threats and propose effective conservation policies (Jetz et  
70 al. 2007). LULC is also an important predictor of species' occurrence and, thus extensively used in  
71 ecological and conservation studies (Eyring et al. 2016; Ruiz-Benito et al. 2020; Sobral-Souza et al.  
72 2021). There are several LULC datasets available at a global scale under current conditions, such as  
73 the Copernicus (Buchhorn et al. 2020), Global Land Survey, the 30 Meter Global Land Cover, and  
74 the GlobeLand30 (Gutman et al. 2013; Pengra et al. 2015; Brovelli et al. 2015), as well as the near  
75 historical period, such as the ESA Climate Change Initiative (1992 to 2015), the Finer Resolution  
76 Observation, Monitoring of Global Land Cover (1984 to 2011) (Hollmann et al. 2013; Gong et al.  
77 2013) and GCAM (2015- 2100) (Chen et al. 2020). These datasets are usually available in standard  
78 Geographic Information System (GIS) formats (e.g. TIF or KMZ), routinely used by landscape  
79 ecologists, macroecologists, biogeographers and others (Eyring et al. 2016; Ruiz-Benito et al. 2020;  
80 Sobral-Souza et al. 2021). However, there is an important gap of historical LULC data covering  
81 pre-industrial periods (i.e. older than 1700) and, more importantly, projecting LULC changes into  
82 the future. Currently, only two initiatives provide future projections: Global Change Analysis  
83 Model (Chen et al. 2020) and Land-Use Harmonization Project (<https://luh.umd.edu/data.shtml>,  
84 Hurtt et al. 2006; 2011; 2020), and only the last one provides a long historical time-series. The  
85 absence of compatible dataset across past, present and future scenarios, for example, hinders the use  
86 of LULC predictors in projections of ecological niche and species distribution models throughout  
87 the time and hamper global change analyses (Escobar et al. 2018).

88 The recent and robust LULC dataset called Land-Use Harmonization project is part of the  
89 Coupled Model Intercomparison Project (CMIP) (<https://luh.umd.edu/data.shtml>, Hurtt et al. 2006;  
90 2011; 2020), which coordinates modeling experiments worldwide used by the Intergovernmental  
91 Panel on Climate Change (IPCC) (Eyring et al. 2016). The data is an input to Earth System Models

92 (ESMs) to estimate the combined effects of human activities on the carbon-climate system.  
93 Currently, CMIP datasets are available in NetCDF format, a quite complex file format for most  
94 researchers. A few studies used or analyzed the CMIP LULC (Xia & Niu 2020 and references  
95 therein), as opposed to CMIP's climate data already simplified on standard GIS formats available in  
96 WorldClim (<https://www.worldclim.org/>, Fick and Hijmans 2017) and ecoClimate  
97 (<https://www.ecoclimate.org/>, Lima-Ribeiro et al. 2015).

98 The Land-Use Harmonization project (LUH2) provides the most complete data in term of  
99 time-series and scenarios of climate change. The data covers a period from 850 to 2300 at 0.25°  
100 spatial resolution (ca. 30 km). The first generation of models (LUH1, Hurtt et al. 2006; 2011) made  
101 future land-use land-cover projections under CMIP5's Representative Concentration Pathways  
102 greenhouse gas scenarios (RCPs, see Vuuren et al. 2011), and the current generation of models  
103 (LUH2, Hurtt et al. 2020) makes projection under CMIP6's Shared Socioeconomic Pathways  
104 greenhouse gas scenarios (SSP, see Popp et al. 2017). Both provide data on 12 land-use land-cover  
105 state classes, including different categories of natural vegetation, agriculture and urban areas. In  
106 order to make the global Land-Use Harmonization data more accessible and readily usable, here we  
107 filtered, combined and transformed it in standard GIS formats, making the dataset accessible for  
108 users with standard GIS skills. Besides providing the Land-Use Harmonization data in regular GIS  
109 format at yearly temporal resolution covering 1251 years of past, present and future (from 850 to  
110 2100), we also derived new data based on the existing dataset.

111  
112  
113

## METHODS

114 We downloaded the 12 land-use land-cover state layers (state.nc) provided in Network  
115 Common Data Form (NetCDF) from the Land-Use Harmonization Project (LUH2,  
116 <https://luh.umd.edu/data.shtml>): forested primary land (primf), non-forested primary land (primn),  
117 potentially forested secondary land (secdf), potentially non-forested secondary land (secdn),  
118 managed pasture (pastr), rangeland (range), urban land (urban), C3 annual crops (c3ann), C3  
119 perennial crops (c3per), C4 annual crops (c4ann), C4 perennial crops (c4per), C3 nitrogen-fixing  
120 crops (c3nfx). The “forested” and “non-forested” land-use states are defined on the basis of the  
121 aboveground standing stock of natural cover; where “primary” are lands previously undisturbed by  
122 human activities, and “secondary” are lands previously disturbed by human activities and currently  
123 recovered or in process of recovering of their native aspects (see Hurtt et al. 2006; 2011; 2020 for  
124 more details). They were computed using an accounting-based method that tracks the fractional  
125 state of the land surface in each grid cell as a function of the land surface at the previous time step  
126 through historical data. Because it deals with a large and undetermined system, the approach was to  
127 solve the system for every grid cell at each time step, constraining with several inputs including  
128 land-use maps, crop type and rotation rates, shifting cultivation rates, agriculture management,  
129 wood harvest, forest transitions and potential biomass and biomass recovery rates (see Fig. S1 in the  
130 Supplementary Material for details).

131 To manipulate the NetCDF files, we used the `ncdf4` and `rgdal` packages in R environment (R  
132 Core Team 2020, Pierce 2019; Hijmans et al. 2020; Bivand et al. 2021). We also used the Panoply  
133 software version 4.8 for quick visualization of the original data (states.nc) (Schmunk, 2017  
134 <https://www.giss.nasa.gov/tools/panoply/>).

135 We created two sets of files for each year, the continuous “state-files” and the categorical  
136 “LULC-files” (Fig.1, Fig.2 and Fig. S2 of supplemental material). The state- files are the same data  
137 provided in the original LUH2 dataset (states.nc), transformed into Tag Image File Format (TIFF)  
138 and standardized for ranging from 0 to 1. We built the new LULC-files, also in TIFF format,  
139 assigning the highest value among the 12 available states to each pixel. For instance, if the highest  
140 value in a given pixel is the forest state value, it was categorically set as a forest pixel. Thus, the  
141 LULC-files present categories ranging from 1 to 12, which represents each one of the 12 existing  
142 states in the dataset (Table S1 in Supplementary Material). We generated states-files and LULC-  
143 files for every year from 850 to 2100 for two greenhouse gas scenarios: an intermediate (SSP2-4.5)

144 and a pessimistic (SSP5-8.5) (see Fig. S2 in Supplementary Material for the workflow to create  
145 state files and LULC-files). The SSP2-4.5 scenario, a.k.a “Middle of the Road”, represents a 4.5  
146 W/m<sup>2</sup> radiative forcing by 2100, where historical development patterns continue throughout the 21<sup>st</sup>  
147 century, susceptibility to societal and environmental changes remains, and greenhouse gas  
148 emissions are at intermediate levels. The SSP5-8.5, a.k.a. “Fossil-fueled Development”, on the  
149 other hand, represents the upper limit of the SSP scenarios spectrum economic, where social  
150 development is coupled with the exploitation of abundant fossil fuel resources, an energy intensive  
151 lifestyles, and high levels of greenhouse gas emissions (Popp et al. 2017; Meinshausen et al. 2020;  
152 Gatti et al. 2021).

153 We performed an accuracy assessment of our classification for the LULC-files following  
154 Olofsson et al.’s (2014) good practices, for the all continents together and for Newton and Dale’s  
155 (2001) zoogeographic regions separately. We compared our classified LULC-file for the year 2000  
156 with that of the Global Land Cover SHARE (GLC-SHARE) data, used as the ground truth reference  
157 data in the accuracy assessment. The GLC-SHARE was built from a combination of “best  
158 available” high resolution national, regional and/or sub-national land cover databases (Latham et al.  
159 2014), and has a finer spatial resolution (1 km) than the LUH2 (30 km). GLC-SHARE has 11  
160 classes that are very similar with those from the LUH2 database: artificial surfaces (01), cropland  
161 (02), grassland (03), tree covered areas (04), shrubs covered areas (05), herbaceous vegetation,  
162 aquatic or regularly flooded (06), mangroves (07), sparse vegetation (08), bare soil (09), snow and  
163 glaciers (10), and water bodies (11). To make the two datasets comparable, we reclassified LUH2  
164 and GLC-SHARE to the following classes: forest, crops, open areas and urban (Fig. 3, Table S1 in  
165 Supplementary Material). We also masked-out ice and water areas from GLC-SHARE, as they do  
166 not have an equivalent in the LUH2 dataset. Thus, Greenland was removed from analysis and is  
167 absent in the LULC-files. We performed the accuracy assessment in QGIS 3.20 through a confusion  
168 matrix error, quantifying the commission and omission errors for each class, and then computing  
169 three primary metrics: Overall Accuracy (OA), Producer Accuracy (PA) and User Accuracy (UA).  
170 We also provide other supplemental metrics, such as Kappa, Allocation Disagreement and Quantity  
171 Disagreement using Map Accuracy Tools (Salk et al. 2018) so that users can choose the best metric  
172 given their purpose (see supplemental material Accuracies.xlsx).

173 All codes to perform the analysis are available on the GitHub platform  
174 ([https://github.com/Tai-Rocha/LUH2\\_Data](https://github.com/Tai-Rocha/LUH2_Data)). The entire resulting dataset is freely available for  
175 download at the ecoClimate repository (<https://www.ecoclimate.org/>), an open database of  
176 processed environmental data in a suitable resolution and user-friendly format (Lima-Ribeiro et al.  
177 2015).

178  
179  
180

## RESULTS

181 We generated 17.394 files, 16.056 of which are the LUH2 original (continuous data) states  
182 files transformed into TIFF (Fig. 1), and the other 1.338 are new (categorical data) LULC-files  
183 created by combining the 12 states files (Fig. 2). The LULC-files had good results for most  
184 zoogeographic regions and land-use land-cover classes, but not for all (Fig. 3, Table 1). The overall  
185 accuracy (OA) was over than 70% for global scale and for most regions, except for the Neotropics,  
186 with 65 % overall accuracy. Australasia had the highest OA, with 82% accuracy (see Table 1 and  
187 supplemental material S3 for all metrics of accuracy).

188 The producer accuracy (PA) and user accuracy (UA) for land-use land-cover classes in  
189 zoogeographic regions showed some interesting patterns (Table 1 and supplemental tables S3). For  
190 crops, there was good PA (71% to 90%) and poor or moderated UA (14% to 59%), except for the  
191 Indomalayan region (UA = 77%). Forest had moderate to good PA (61% to 91%) and poor to good  
192 UA (42% to 84%). Open area had poor to good PA (47% to 81%), moderate to good UA (71% to  
193 93%). Urban areas had poor to good PA (30% to 83%) and very poor or poor UA (2% to 40%).

194 The Land-use Harmonized project shows important changes in LULC through time (Fig. 1  
195 and 2), although with no noticeable difference between greenhouse gas scenarios within the same



196 year (Fig. 4). It predicts a pronounced decrease in primary forest, and an equally pronounced  
197 increase in secondary forest and non-forest lands (Fig. 4). The decrease in primary forest is  
198 particularly noticeable in the Amazon, the Brazilian Atlantic Forest, the Congo Basin and the boreal  
199 forests (Fig. 1), coupled with an increase in secondary forest in these regions (Fig. 2). A predicted  
200 increase in C4 annual, C3 nitrogen-fixing and C3 perennial crops is especially pronounced in the  
201 Brazilian Atlantic Forest and sub-Saharan Africa (Fig. 2). These crops will apparently replace  
202 managed pastures in Africa's Great Lakes region. Finally, there is also a specially pronounced  
203 predicted decrease in non-forested primary land (Fig. 4), especially in northern Africa and in the  
204 Horn of Africa (Fig. 2).

205  
206

## DISCUSSION

207 This data paper is an important contribution in making the Land-Use Harmonization project  
208 data more accessible. Here, we provide a global scale LULC dataset with yearly time resolution  
209 over a period of 1251 years (from 850 to 2100), and considerable spatial resolution (0.25° long/lat).  
210 We contributed not only by transforming the data into standard GIS file format, but also by  
211 providing new categorical data on land-use land-cover through a long time period. This LULC  
212 database provides support for several research fields in ecology and biodiversity, by disseminating  
213 open datasets/open-source tools for a quality, transparent and inclusive science. Our open, ready-to-  
214 use and user-friendly database will enable a more robust integration between climate and land-use  
215 change within biodiversity science (Titeux et al. 2017; Albert et al. 2020; Hanna et al. 2020).

216 Given that overall accuracy is still a widely used metric (e.g. Curtis et al. 2018; Gong et al.  
217 2019; Kafy et al. 2021; Liu et al. 2021), our LULC-files provide good quality data (70% to 82%  
218 OA), especially for large and coarse scale studies. Besides, we follow the best practices suggested  
219 by Olofsson et al. (2014) for validation, considering a reference map with higher quality than the  
220 map classification. Validation requires the matching of both maps in terms of classes. Thus, we  
221 carefully choose a reference map (GLC-SHARE) that shared similarities with LUH2 in terms of  
222 number of classes, which we believe reduced the biases in the reclassification process. In any case,  
223 we suggest that users consult Table 1 and supplemental file Accuracies.xlsx for classes' accuracy at  
224 different zoogeographic regions when performing regional analysis.

225 The most pronounced changes predicted by the Land-use Harmonized project between years  
226 2020 and 2100 are the decrease in primary forest and the increase in secondary forest and non-  
227 forested lands (Fig.4, SSP2-4.5 and SSP5-8.5). It is important to note that "primary" refers to intact  
228 land, undisturbed by human activities since 850, while "secondary" refers to land undergoing a  
229 transition or recovering from previous human activities (Hurr et al. 2006; 2011; 2020). A major  
230 concern regarding the reduction of primary forest is, obviously, habitat loss and associated  
231 biodiversity decline, specially of rarer species (Chase et al. 2020; Horta and Santos 2020; Lima et  
232 al. 2020), in addition to increased greenhouse gas emissions (Mackey et al. 2020) and likelihood of  
233 pandemics associated with viral spillover from wildlife to humans (Dobson et al. 2020). Predicted  
234 forest loss is noticeable in the Amazon, Brazilian Atlantic Forest, Congo Basin and boreal forests,  
235 especially under the SSP5-8.5 (Fig. 1 and Fig. 2), which is in agreement with recent findings.  
236 Svensson et al. (2019) found, for example, a decrease from 75% to 38% in boreal forests between  
237 years 1973 and 2013, and Shapiro et al. (2021) showed that over 24 million hectares of forest were  
238 degraded in the Congo Basin between years 2000 and 2016. Similar or worse scenarios are  
239 happening in the Amazon and Atlantic Forest (Junior et al. 2021; Rosa et al. 2021). This is  
240 happening particularly inside Brazil, where recent governmental actions have promoted  
241 deforestation and forest fires (Escobar 2019; 2020; Amigo 2020; Silva et al. 2021; França et al.  
242 2021; Qin et al. 2021; Vale et al. 2021), with record deforestation rates in the Amazon (Junior et al.  
243 2021). Although not captured quantitatively at the global analysis (Fig.4), another relevant regional  
244 level prediction is the increase in C4 annual, C3 nitrogen-fixing, and C3 perennial crops in the  
245 Brazilian Atlantic Forest and sub-Saharan Africa (Fig. 2). Other studies have similar predictions  
246 (Zabel et al. 2019), and the trend is already observed in the Atlantic Forest (Rosa et al. 2021).

247 The data provided here provides support for several analysis in ecology and biodiversity.

248 The continuous data in the state-files may be particularly useful as predictors in ecological niche  
249 modeling (Peterson et al. 2011) or can be combined to species distribution models to reconstruct  
250 changes in species distributions (Sofaer et al. 2019; Cazaca et al. 2020). The forested primary land  
251 state, for example, can be used to model the distribution of forest-dependent species, as in birds  
252 from the Atlantic Forest biodiversity hotspot (Vale et al. 2018). This data has the advantage of being  
253 represented in continuous values, as opposed to most discrete land cover data (e.g. all datasets cited  
254 in this paper), overcoming the shortcoming of using categorical data as layers in ecological niche  
255 modeling (Peterson 2001). More importantly, it allows for the use of land cover data in projections  
256 of species distribution under future climate change scenarios. Additionally, the categorical data in  
257 the LULC-files can be useful in ecosystem services mapping, especially when working with the  
258 widely-used InVEST modeling tool (<https://naturalcapitalproject.stanford.edu/software/invest>),  
259 which is highly dependent on land-use land-cover data (Sharp et al. 2020). The LULC-files can also  
260 be used in studies of global change impacts from other perspectives (Mantyka-Pringle et al. 2015;  
261 Titeux et al. 2017; Newbold 2018; Clerici et al. 2019; Hong et al. 2019; Jetz et al 2007; Powers and  
262 Jetz 2019). Least, but not least, the data can help decision-makers in the construction of evidence  
263 based mitigation and conservation policies (Martinez-Fernández et al. 2015; Dong et al. 2018). We  
264 hope that the dataset provided here, which is freely available for download at ecoClimate repository  
265 (<https://www.ecoclimate.org/>), can foster the use of land-use land-cover data in many and different  
266 fields of study.

267

268

269

#### LITERATURE CITED

- 270 Albert, C. H., M. Hervé, M. Fader, A. Bondeau, A., Leriche, A. C. Monnet, and W. Cramer. 2020.  
271 What ecologists should know before using land use/cover change projections for  
272 biodiversity and ecosystem service assessments. *Reg. Environ. Change* 20:1-12.  
273 doi:10.1007/s10113-020-01675-w
- 274 Amigo, I. 2020. When will the Amazon hit a tipping point? *Nature* 578(7796): 505-508.  
275 doi:10.1038/d41586-020-00508-4
- 276 Ay, J. S., J. Guillemot, J. Martin-StPaul, N. Doyen, L. and P. Leadley. 2017. The economics of land  
277 use reveals a selection bias in tree species distribution models. *Glob. Ecol. Biogeogr.* 26(1):  
278 65-77. doi: 10.1111/geb.12514
- 279 Bivand, R., T. Keitt, B. Rowlingson, E. Pebesma, M. Sumner, R. Hijmans, E. Rouault, and M.R  
280 Bivand. 2015. rgdal: Bindings for the Geospatial Data Abstraction Library. R package  
281 version 1.5-12.
- 282 Brovelli, M. A., M. E. Molinari, E. Hussein, J. Chen, and R. Li. 2015. The first comprehensive  
283 accuracy assessment of global and 30 at a national level: Methodology and results". *Remote*  
284 *Sens.* 7:4191-4212. doi:10.3390/rs70404191
- 285 Buchhorn, M., M. Lesiv, N. E. Tsendbazar, M. Herold, L. Bertels, and B. Smets. 2020. Copernicus  
286 global land cover layers—collection 2. *Remote Sens.* 12(6): 1044. doi: [10.3390/rs12061044](https://doi.org/10.3390/rs12061044)
- 287 Casazza, G., F. Malfatti, M. Brunetti, V. Simonetti, and A. S. Mathews. A. S. 2021. Interactions  
288 between land use, pathogens, and climate change in the Monte Pisano, Italy 1850–2000.  
289 *Landsc. Ecol.* 36(2): 601-616. doi:[10.1007/s10980-020-01152-z](https://doi.org/10.1007/s10980-020-01152-z)
- 290 Chase, J. M., S.A. Blowes, T. M Knight, K. Gerstner, and F. May, F. 2020. Ecosystem decay  
291 exacerbates biodiversity loss with habitat loss. *Nature* 584(7820): 238-243. doi:  
292 [doi.org/10.1038/s41586-020-2531-2](https://doi.org/10.1038/s41586-020-2531-2)
- 293 Chen, M., C. R. Vernon, N. T. Graham, M. Hejazi, M. Huang, Y. Cheng, and K. Calvin. 2020.  
294 Global land use for 2015–2100 at 0.05° resolution under diverse socioeconomic and climate  
295 scenarios. *Sci. Data* 7:1-11. doi:10.1038/s41597-020-00669-x.
- 296 Clerici, N., F. Cote-Navarro, F. J. Escobedo, K. Rubiano, and J. C. Villegas. 2019. Spatio-temporal  
297 and cumulative effects of land use-land cover and climate change on two ecosystem services

- 298 in the Colombian Andes. *Sci. Total Environ.* 685:1181-1192. doi:  
299 10.1016/j.scitotenv.2019.06.275
- 300 Curtis, P. G., C. M. Slay, N. L. Harris, A. Tyukavina, and M. C. Hansen. 2018. Classifying drivers  
301 of global forest loss. *Science*, 361(6407), 1108-1111. doi:10.1126/science.aau3445
- 302 Dobson, A.P., S.L. Pimm, L. Hannah, L. Kaufman, J. A. Ahumada, A. W. Ando, A. Bernstein, J.  
303 Busch, P. Daszak, J. Engelmann, M. F. Kinnaird, B. V. Li, T. Loch-Temzelides, T. Lovejoy,  
304 K. Nowak, P. R. Roehrdanz, and M. M. Vale. 2020. Ecology and economics for pandemic  
305 prevention. *Science*, 369(6502): 379-381.
- 306 Dong, N., L. You, W. Cai, G. Li, and H. Lin. 2018. Land use projections in China under global  
307 socioeconomic and emission scenarios: Utilizing a scenario-based land-use change  
308 assessment framework. *Glob. Environ. Change* 50, 164-177.  
309 doi:10.1016/j.gloenvcha.2018.04.001
- 310 Escobar, L. E., H. Qiao, J. Cabello, and A. T. Peterson. 2018. Ecological niche modeling  
311 reexamined: A case study with the Darwin's fox. *Ecol. Evol.* 8:4757-4770.  
312 doi:10.1002/ece3.4014
- 313 Escobar, H. 2019. Amazon fires clearly linked to deforestation, scientists say. *Science*, 853-853.  
314 doi:10.1126/science.365.6456.853
- 315 Escobar, H. 2020. Deforestation in the Brazilian Amazon is still rising sharply. *Science*, 613. doi:  
316 10.1126/science.369.6504.613
- 317 Eyring, V., S. Bony, G. A. Meehl, C. A. Senior, B. Stevens, R. J. Stouffer, and K. E. Taylor. 2016.  
318 Overview of the Coupled Model Intercomparison Project Phase 6 (CMIP6) experimental  
319 design and organization. *Geosci. Model Dev.* 9:1937-1958. doi:10.5194/gmd-9-1937-2016.
- 320 França, F., R. Solar, A. C. Lees, L. P. Martins, E. Berenguer, and J. Barlow. 2021. Reassessing the  
321 role of cattle and pasture in Brazil's deforestation: A response to "Fire, deforestation, and  
322 livestock: When the smoke clears". *Land Use Policy* 108:105195.  
323 doi:10.1016/j.landusepol.2020.105195
- 324 Gatti L.V., L. S. Basso, J. B. Miller, M. Gloor, L.G. Domingues, H. L. G. Cassol, G. Tejada, L.  
325 E. O. C. Aragão, C. Nobre, W. Peters, L. Marani E. Arai, A. H. Sanches, S. M. Corrêa, L.  
326 Anderson, C.V. Randow, C. S. C. Correia, S. P. Crispim, and R. A. L. Neves. 2021.  
327 Amazonia as a carbon source linked to deforestation and climate change. *Nature* 595: 388-  
328 393. doi:10.1038/s41467-019-10775-z
- 329 Gong, P., J. Wang, L. Yu, Y. Zhao, Y. Zhao, L. Liang, Z. Niu, X. Huang, H. Fu, S. Liu, C. Li, X. Li,  
330 W. Fu, C. Liu, Y. Xu, X. Wang, Q. Cheng, L. Hu, W. Yao, H. Zhang, P. Zhu, Z. Zhao, H.  
331 Zhang, Y. Zheng, L. Ji, Y. Zhang, H. Chen, A. Yan, J. Guo, L. Yu, L. Wang, X. Liu, T. Shi, M.  
332 Zhu, Y. Chen, G. Yang, P. Tang, B. Xu, C. Giri, N. Clinton, Z. Zhu, J. Chen, and J. Chen.  
333 2013. Finer resolution observation and monitoring of global land cover: First mapping results  
334 with Landsat TM and ETM+ data. *Int. J. Remote Sens.* 34:2607-2654.  
335 doi:10.1080/01431161.2012.748992.
- 336 Gutman, G., C. Huang, G. Chander, P. Noojipady, and J. G. Masek. 2013. Assessment of the  
337 NASA-USGS Global Land Survey (GLS) datasets. *Remote Sens. Environ.* 134:249-265.  
338 doi:10.1016/j.rse.2013.02.026.
- 339 Hanna, D. E. L., C. Raudsepp-Hearne, and E. M. Bennett. 2020. Effects of land use, cover, and  
340 protection on stream and riparian ecosystem services and biodiversity. *Conserv. Biol.* 34:  
341 244-255. doi:10.1111/cobi.13348.
- 342 Hong, J., G. S. Lee, J. J. Park, H. H. Mo, and K. Cho. 2019. Risk map for the range expansion of  
343 Thrips palmi in Korea under climate change: Combining species distribution models with  
344 land-use change. *J. Asia Pac. Entomol.* 22(3): 666-674. doi:10.1016/j.aspen.2019.04.013
- 345 Hortal, J., and A. M. Santos. 2020. Rethinking extinctions that arise from habitat loss. *Nature*  
346 584,194-195. doi:10.1038/d41586-020-02210-x
- 347 Fick, S. E., and R. J. Hijmans. 2017. WorldClim 2: new 1-km spatial resolution climate surfaces for  
348 global land areas. *Int. J. Climatol.* 37: 4302-4315. doi:10.1002/joc.5086.
- 349 Hijmans, R. J. 2020. raster: geographic data analysis and modeling. R package version 3.3.13.

- 350 Hollmann, R., C. J. Merchant, R. Saunders, C. Downy, M. Buchwitz, A. Cazenave, E. Chuvieco, P.  
351 Defourny, G. de Leeuw, R. Forsberg, T. Holzer-Popp, F. Paul, S. Sandven, S. Sathyendranath,  
352 M. van Roozendaal, and W. Wagner. 2013. The ESA climate change initiative: Satellite data  
353 records for essential climate variables. *Bull. Am. Meteorol. Soc.* 94:1541-1552.  
354 doi:10.1175/BAMS-D-11-00254.1
- 355 Hurtt, G. C., L. P. Chini, S. Frolking, R. A. Betts, J. Feddema, G. Fischer, J. P. Fisk, K. Hibbard, R.  
356 A. Houghton, A. Janetos, C. D. Jones, G. Kindermann, T. Kinoshita, Kees Klein Goldewijk,  
357 K. Riahi, E. Shevliakova, S. Smith, E. Stehfest, A. Thomson, P. Thornton, D. P. van Vuuren,  
358 and Y. P. Wang. 2011. Harmonization of land-use scenarios for the period 1500-2100: 600  
359 years of global gridded annual land-use transitions, wood harvest, and resulting secondary  
360 lands. *Clim. Change* 109:117-161. doi: 10.1007/s10584-011-0153-2.7
- 361 Hurtt, G. C., L. Chini, R. Sahajpal, S. Frolking, B. L. Bodirsky, K. Calvin, J. C. Doelman, J. Fisk, S.  
362 Fujimori, K. K. Goldewijk, T. Hasegawa, P. Havlik, A. Heinemann, F. Humpenöder, J.  
363 Jungclaus, J. Kaplan, J. Kennedy, T. Krisztin, D. Lawrence, P. Lawrence, L. Ma, O. Mertz, J.  
364 Pongratz, A. Popp, B. Poulter, K. Riahi, E. Shevliakova, E. Stehfest, P. Thornton, F. N.  
365 Tubiello, D. P. van Vuuren, and X. Zhang. 2020. Harmonization of global land use change and  
366 management for the period 850-2100 (LUH2) for CMIP6. *Geosci. Model Dev.* 13:5425-5464.  
367 doi: 10.5194/gmd-13-5425-2020
- 368 Hurtt, G. C., S. Frolking, M. G. Fearon, B. Moore, E. Shevliakova, S. Malyshev, S. W. Pacala, and  
369 R. A. Houghton. 2006. The underpinnings of land-use history: three centuries of global  
370 gridded land-use transitions, wood-harvest activity, and resulting secondary lands. *Glob.*  
371 *Change Biol.* 12:1208-1229. doi:10.1111/j.1365-2486.2006.01150.x
- 372 Jetz, W., D. S. Wilcove, and A. P. Dobson. 2007. Projected impacts of climate and land-use change  
373 on the global diversity of birds. *PLOS Biol.* 5:1211-1219. doi:10.1371/journal.pbio.0050157
- 374 Junior, C. H. S., A. C. Pessôa, N. S. Carvalho, J. B. Reis, L. O. Anderson, and L. E. Aragão. 2021.  
375 The Brazilian Amazon deforestation rate in 2020 is the greatest of the decade. *Nat. Ecol. Evol.*  
376 5(2): 144-145. doi:10.1038/s41559-020-01368-x
- 377 Kafy, A.A., A. Al Rakib, K. S. Akter, Z. A. Rahaman, A. A. Faisal, S. Mallik, N. R. Nasher, M. I.  
378 Hossain, and M. Y. Ali. 2021. Monitoring the effects of vegetation cover losses on land  
379 surface temperature dynamics using geospatial approach in Rajshahi city, Bangladesh.  
380 *Environ. Challenges* 100187. doi:10.1016/j.envc.2021.100187
- 381 Latham, J., R. Cumani, I. Rosati, and M. Bloise. 2014. Global land cover SHARE (GLC-SHARE).  
382 FAO: Rome, Italy. Version 1.0-2014. Available at: [http://www.fao.org/uploads/media/glc-](http://www.fao.org/uploads/media/glc-share-doc.pdf)  
383 [share-doc.pdf](http://www.fao.org/uploads/media/glc-share-doc.pdf)
- 384 Lima-Ribeiro, M. S. 2015. EcoClimate: a database of climate data from multiple models for past,  
385 present, and future for macroecologists and biogeographers. *Biodivers. Inform.* 10:1-21.  
386 doi:10.17161/bi.v10i0.4955.
- 387 Lima, R. A., A. A. Oliveira, G. R. Pitta, A. L. de Gasper, A. C. Vibrans, J. Chave, H. Ter Steege,  
388 and Prado, P.I., 2020. The erosion of biodiversity and biomass in the Atlantic Forest  
389 biodiversity hotspot. *Nat. Commun.* 11(1): 1-16. doi:10.1038/s41467-020-20217-w
- 390 Liu, L., X. Zhang, Y. Gao, X. Chen, X. Shuai, and J. Mi. 2021. Finer-Resolution Mapping of Global  
391 Land Cover: Recent Developments, Consistency Analysis, and Prospects. *J. Remote Sens.*  
392 2021(5289697):1-38. doi:10.34133/2021/5289697
- 393 Mackey, B., C. F. Kormos, H. Keith, W. R Moomaw, R. A. Houghton, R. A. Mittermeier, D. Hole,  
394 and S. Hugh. 2020. Understanding the importance of primary tropical forest protection as a  
395 mitigation strategy. *Mitig. Adapt. Strateg. Glob. Change* 25: 763-787. doi:10.1007/s11027-  
396 019-09891-4
- 397 Maxwell, S. L., R. A. Fuller, T. M. Brooks, and J. E.M. Watson. 2016. Biodiversity: the ravages of  
398 guns, nets and bulldozers. *Nature* 536:143-145. doi: 10.1038/536143a
- 399 Mantyka-Pringle, C. S., P. Visconti, M. Di Marco, T. G. Martin, C. Rondinini, and J. R. Rhodes.  
400 2015. Climate change modifies risk of global biodiversity loss due to land-cover change. *Biol.*  
401 *Conserv.* 187: 103-111. doi:10.1016/j.biocon.2015.04.016



- 402 Martinez-Fernandez, J., P. Ruiz-Benito, and M. A. Zavala. 2015. Recent land cover changes in  
403 Spain across biogeographical regions and protection levels: Implications for conservation  
404 policies. *Land Use Policy* 44: 62-75. doi:[doi.org/10.1016/j.landusepol.2014.11.021](https://doi.org/10.1016/j.landusepol.2014.11.021)
- 405 Meinshausen, M., Z. Nicholls, J. Lewis, M. J. Gidden, E. Vogel, M. Freund, U. Beyerle, C.  
406 Gessner, A. Nauels, N. Bauer, J. G. Canadell, J. S. Daniel, A. John, P. Krummel, G. Luderer,  
407 N. Meinshausen, S. A Montzka, P. Rayner, S. Reimann, S. J Smith, M. van den Berg, G. J. M.  
408 Velders, M. Vollmer, and H. J. Wang. 2020. The shared socio-economic pathway (SSP)  
409 greenhouse gas concentrations and their extensions to 2500. *Geosci. Model Dev.*13(8), 3571-  
410 3605. doi:10.5194/gmd-13-3571-202
- 411 Newton I, and L. Dale. 2001. A comparative analysis of the avifaunas of different zoogeographical  
412 regions. *J. Zool.* 254:207-218. doi:10.1017/S0952836901000723
- 413 Newbold, T. 2018. Future effects of climate and land-use change on terrestrial vertebrate  
414 community diversity under different scenarios. *Proc. R.Soc. B*, 285(1881): 20180792.  
415 doi:10.1098/rspb.2018.0792
- 416 Qin Y., X. Xiao , J. P. Wigneron, P. Ciais , M. Brandt , L. Fan , X. Li , S. Crowell , X. Wu , R.  
417 Doughty , Y. Zhang , F. Liu , S. Sitch , and B. Moore. 2021. Carbon loss from forest  
418 degradation exceeds that from deforestation in the Brazilian Amazon. *Nat. Clim. Change*,  
419 11(5): 442-448. doi:10.1038/s41558-021-01026-5
- 420 Pengra, B., J. Long, D. Dahal, S. V. Stehman, and T. R. Loveland. 2015. A global reference database  
421 from very high resolution commercial satellite data and methodology for application to  
422 Landsat derived 30m continuous field tree cover data. *Remote Sens. Environ.* 165:234-248.  
423 doi:10.1016/j.rse.2015.01.018.
- 424 Peterson, A. T. 2001. Predicting species' geographic distributions based on ecological niche  
425 modeling. *Condor* 103:599-605. doi:10.1093/condor/103.3.599
- 426 Peterson, A. T., J. Soberón, R. G. Pearson, R. P. Anderson, E. Martínez-Meyer, M. Nakamura, and  
427 M. Araújo. B. 2011. *Ecological Niches and Geographic Distributions*. Princeton University  
428 Press. Princeton, NJ 328pp..
- 429 Pierce, D., and M. D. Pierce. 2019. ncd4: Interface to Unidata netCDF. R package version 1.17.  
430 Available at: <https://www.vps.fmvz.usp.br/CRAN/web/packages/ncdf4/ncdf4.pdf>
- 431 Popp, A., K. Calvin, S. Fujimori, P. Havlik, F. Humpenöder, E. Stehfest, B. L. Bodirsky, J. P.  
432 Dietrich, J. C. Doelmann, M. Gusti, T. Hasegaw, P. Kyl, M. Obersteiner, A. Tabeau, K.  
433 Takahashi, H. Valin, S. Waldhoff, I. Weindl, M. Wise, E. Kriegler , H. Lotze-Campen , O.  
434 Fricko , K. Riahi , D. van Vuuren. 2017. Land-use futures in the shared socio-economic  
435 pathways. *Glob. Environ. Change*, 42:331-345. doi:10.1016/j.gloenvcha.2016.10.002.
- 436 Powers, R. P., and W. Jetz. 2019. Global habitat loss and extinction risk of terrestrial vertebrates  
437 under future land-use-change scenarios. *Nat. Clim. Change* 9(4): 323-329.
- 438 Radinger, J., F. Essl, F. Hölker, P. Horký, O. Slavík, and C. Wolter. 2017. The future distribution  
439 of river fish: The complex interplay of climate and land use changes, species dispersal and  
440 movement barriers. *Glob. Change Biol.* 23(11):4970-4986. doi:10.1111/gcb.13760
- 441 R Core Team. 2020. R: a language and environment for statistical computing. R Foundation for  
442 Statistical Computing. Vienna, Austria.
- 443 Rosa, M.R., P. H. Brancalion, R. Crouzeilles, L. R Tambosi, P. R Piffer, F. E. Lenti, M. Hirota, E.  
444 Santiami, and J. P. Metzger, J.P. 2021. Hidden destruction of older forests threatens Brazil's  
445 Atlantic Forest and challenges restoration programs. *Sci. Adv.* 7(4): eabc4547.  
446 doi:10.1126/sciadv.abc4547
- 447 Ruiz-Benito, P., G. Vacchiano, E. R. Lines, C. P. O. Reyer, S. Ratcliffe, X. Morin, F. Hartig, A.  
448 Mäkelä, R. Yousefpour, J. E. Chaves, A. Palacios-Orueta, M. Benito-Garzón, C. Morales-  
449 Molino, J. J. Camarero, A. S. Jump, J. Kattge, A. Lehtonen, A. Ibrom, and M. A. Zavala.  
450 2020. Available and missing data to model impact of climate change on European forests.  
451 *Ecol. Model.* 416:108870. doi:10.1016/j.ecolmodel.2019.108870

- 452 Salk, C., S. Fritz, L. See, C. Dresel, I. and McCallum. 2018. An exploration of some pitfalls of  
453 thematic map assessment using the new map tools resource. *Remote Sens.* 10(3):376.  
454 doi:10.3390/rs10030376
- 455 Schmunk, R. B. 2017. Panoply: netCDF, HDF and GRIB Data Viewer. NASA Goddard Institute for  
456 Space Studies. Version 4.7.
- 457 Shapiro, A. C., H. S. Grantham, N. Aguilar-Amuchastegui, N. J Murray, V. Gond, D. Bonfils, and O.  
458 Rickenbach. 2021. Forest condition in the Congo Basin for the assessment of ecosystem  
459 conservation status. *Ecol. Indic.* 122:107268. doi:10.1016/j.ecolind.2020.107268
- 460 Sharp, R., J. Douglass, S. Wolny, K. Arkema, J. Bernhardt, W. Bierbower, N. Chaumont, D. Denu,  
461 D. Fisher, K. Glowinski, R. Griffin, R. G. Guannel, A. Guerry, J. Johnson, P. Hamel, C.  
462 Kennedy, C. K. Kim, M. Lacayo, E. Lonsdorf, L. Mandle, L. Rogers, J. Silver, J. Toft, G.  
463 Verutes, A. L. Vogl, S. Wood, and K. Wyatt. 2020. InVEST 3.9.0.post177+ug.gb77feed User's  
464 Guide. The Natural Capital Project, Stanford University, University of Minnesota, The Nature  
465 Conservancy, and World Wildlife Fund. Available at:  
466 [https://storage.googleapis.com/releases.naturalcapitalproject.org/invest-](https://storage.googleapis.com/releases.naturalcapitalproject.org/invest-userguide/latest/index.html)  
467 [userguide/latest/index.html](https://storage.googleapis.com/releases.naturalcapitalproject.org/invest-userguide/latest/index.html)
- 468 Silva, R. D. O., L. G. Barioni, and D. Moran. 2021. Fire, deforestation, and livestock: When the  
469 smoke clears. *Land Use Policy* 100:104949.
- 470 Sobral-Souza, T., J. P. Santos, M.E. Maldaner, M. S. Lima-Ribeiro, and M. C. Ribeiro. 2021.  
471 EcoLand: A multiscale niche modelling framework to improve predictions on biodiversity and  
472 conservation. *Perspect. Ecol. Conserv.* (in press). doi:10.1016/j.pecon.2021.03.008
- 473 Sofaer, H.R., C. S. Jarnevich, I. S. Pearse, R. L. Smyth, S. Auer, G. L. Cook, T. C. Edwards Jr, G.  
474 F. Guala, T. G. Howard, J. T. Morisette, and H. Hamilton. 2019. Development and delivery of  
475 species distribution models to inform decision-making. *BioScience* 69(7):544-557.  
476 doi:10.1093/biosci/biz045
- 477 Svensson, J., J. Andersson, P. Sandström, G. Mikusiński, and B. G. Jonsson. 2019. Landscape  
478 trajectory of natural boreal forest loss as an impediment to green infrastructure. *Conserv. Biol.*  
479 3(1):152-163.
- 480 Taylor, K. E., R. J. Stouffer, and G. A. Meehl. 2012. An overview of CMIP5 and the experiment  
481 design. *Bull. Am. Meteorol. Soc.* 93:485-498. doi:10.1175/BAMS-D-11-00094.1.
- 482 Titeux, N., K. Henle, J. B. Mihoub, A. Regos, I. R. Geijzen-Dorffer, W. Cramer, P. H. Verburg, and  
483 L. Brotons. 2017. Global scenarios for biodiversity need to better integrate climate and land  
484 use change. *Divers. Distrib.* 23:1231-1234. doi:10.1111/ddi.12624.
- 485 Vale, M. M., L. Tourinho, M. L. Lorini, H. Rajão, and M. S. L. Figueiredo. 2018. Endemic birds of  
486 the Atlantic Forest: traits, conservation status, and patterns of biodiversity. *J. Field Ornithol.*  
487 89: 193-206. doi:10.1111/jof.12256.
- 488 Vale, M. M., Berenguer, E., de Menezes, M. A., de Castro, E. B. V., de Siqueira, L. P., and Portela,  
489 R.C.Q. 2021. The COVID-19 pandemic as an opportunity to weaken environmental  
490 protection in Brazil. *Biol. Conserv.* 255:108994. doi:10.1016/j.biocon.2021.108994
- 491 Vuuren, D. P. van, J. A. Edmonds, M. Kainuma, K. Riahi, and J. Weyant. 2011. A special issue on  
492 the RCPs. *Clim. Change*, 109: 1-4. doi:10.1007/s10584-011-0157-y.
- 493 Zabel, F., Delzeit, R., Schneider, J. M., Seppelt, R., Mauser, W., and Václavík, T. 2019. Global  
494 impacts of future cropland expansion and intensification on agricultural markets and  
495 biodiversity. *Nat. Commun.* 10(1): 1-10. doi:10.1038/s41467-019-10775-z

496 **TABLES AND FIGURES**

497

498 Table 1. Classification accuracy for LULC classes at global scale and biogeographical regions. OA:  
499 overall accuracy; PA: producer accuracy; UA: user accuracy. See the confusion matrix and accuracy  
500 metrics in Accuracies.xlsx supplemental file.

501

502

|              | crops |       | forest |       | open areas |       | urban |       |       |
|--------------|-------|-------|--------|-------|------------|-------|-------|-------|-------|
|              | OA    | PA    | UA     | PA    | UA         | PA    | UA    | PA    | UA    |
| Global       | 71.7% | 79.7% | 47.3%  | 70.5% | 66.8%      | 71.2% | 82.7% | 55.5% | 13.2% |
| Afrotropical | 70.9% | 72.2% | 15.1%  | 72.4% | 42.2%      | 70.6% | 93.9% | 50%   | 2%    |
| Australasian | 82%   | 80.5% | 54.9%  | 91.2% | 47%        | 80%   | 98%   | 83.3% | 20%   |
| Indomalayan  | 77.7% | 90%   | 77%    | 83.2% | 83%        | 58.2% | 71.3% | 35.7% | 9.8%  |
| Neartic      | 71.7% | 83.1% | 59.4%  | 61.1% | 84.3%      | 81.2% | 66.9% | 80.9% | 27.9% |
| Neotropical  | 65.4% | 89.5% | 14.8%  | 87.3% | 66.9%      | 47.7% | 88.3% | 39.2% | 40.7% |
| Afrotropical | 71.4% | 71.3% | 53.1%  | 67.7% | 64.7%      | 73.5% | 81.2% | 30.3% | 4%    |

503

504

**2020**

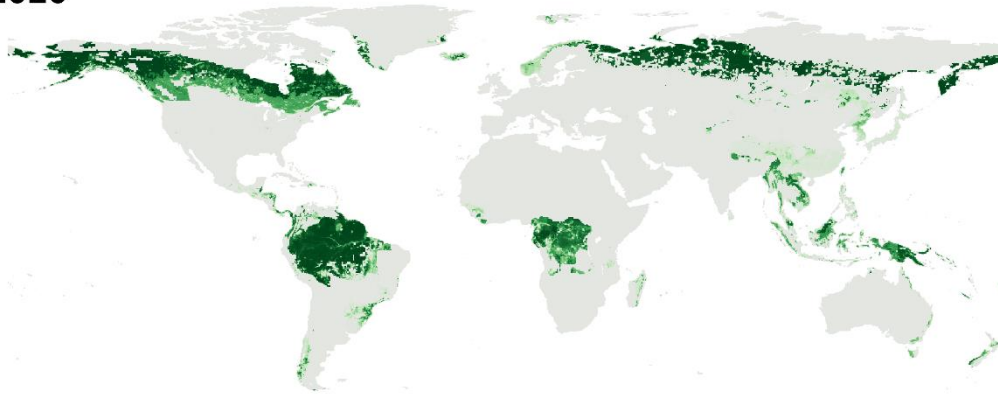

**2100**

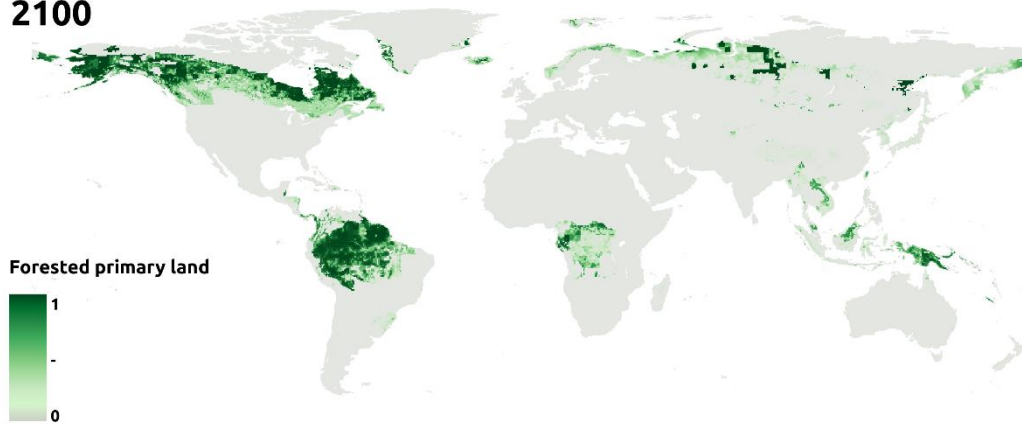

505

506 Figure 1. Example of state-files data. Continuous forested primary land state for 2020 (top) and  
507 2100 (bottom) under SSP5-8.5 greenhouse gas scenario, as originally provided by the Land-Use  
508 Harmonization (LUH2) project. State values range from 0 to 1, roughly representing the likelihood  
509 a pixel is occupied by the land-use land-cover class depicted in the map. All other state-files have  
510 the same structure.



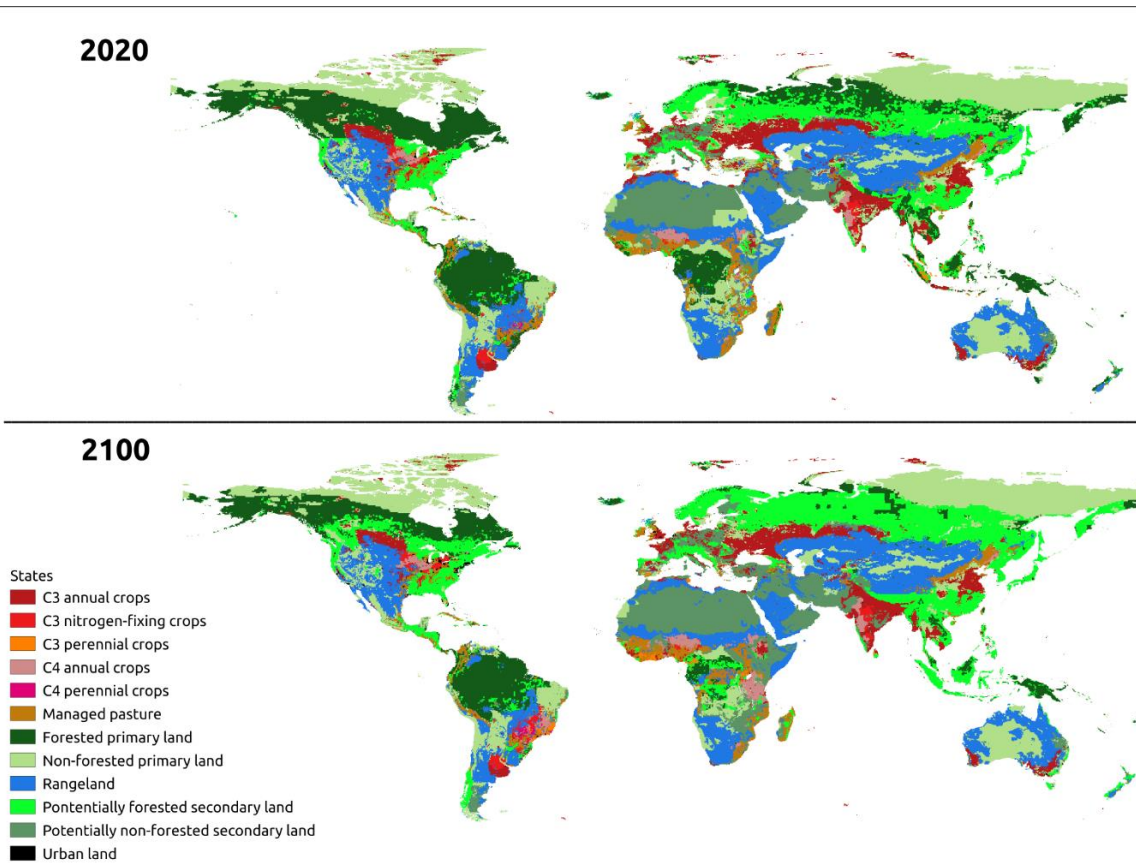

511  
512

513 Figure 2. Example of LULC-files data. Categorical LULC for 2020 (top) and 2100 (bottom) under  
514 SSP5-8.5 greenhouse gas scenarios, as a result of the combination of the 12 LUH2 original state  
515 classes (State-files) into a single map.

Reclassified reference map  
(GLC-SHARE)

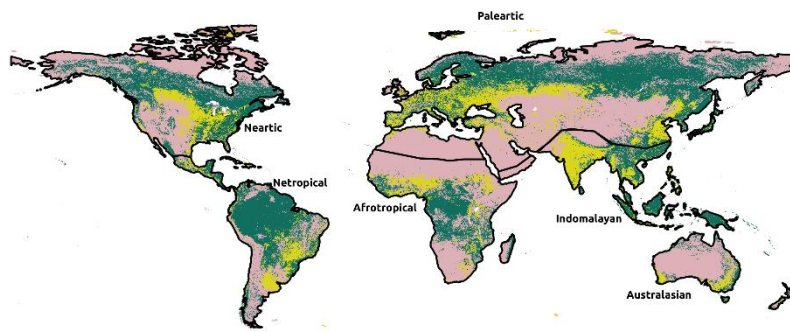

Reclassified LULC map  
(LUH2)

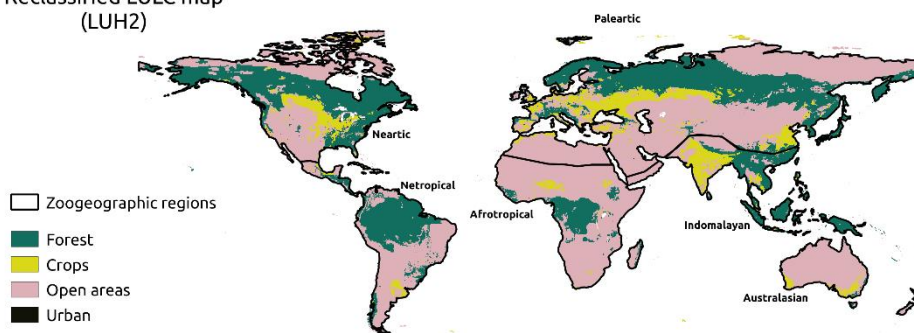

516

Figure 3.

517 Data used in the accuracy assessment of LULC-files. The accuracy of the classification of the  
518 LULC-file (bottom) assessed using the GLC-SHARE as reference data (top). To make the two  
519 datasets comparable, both were reclassified to four land-use land-cover states for the year 2000 (see  
520 Table 1 for reclassification scheme).

521  
522  
523  
524  
525  
526  
527  
528  
529  
530  
531  
532  
533  
534  
535  
536  
537  
538  
539  
540  
541  
542  
543  
544  
545  
546  
547  
548  
549  
550  
551  
552  
553  
554  
555  
556  
557  
558  
559  
560

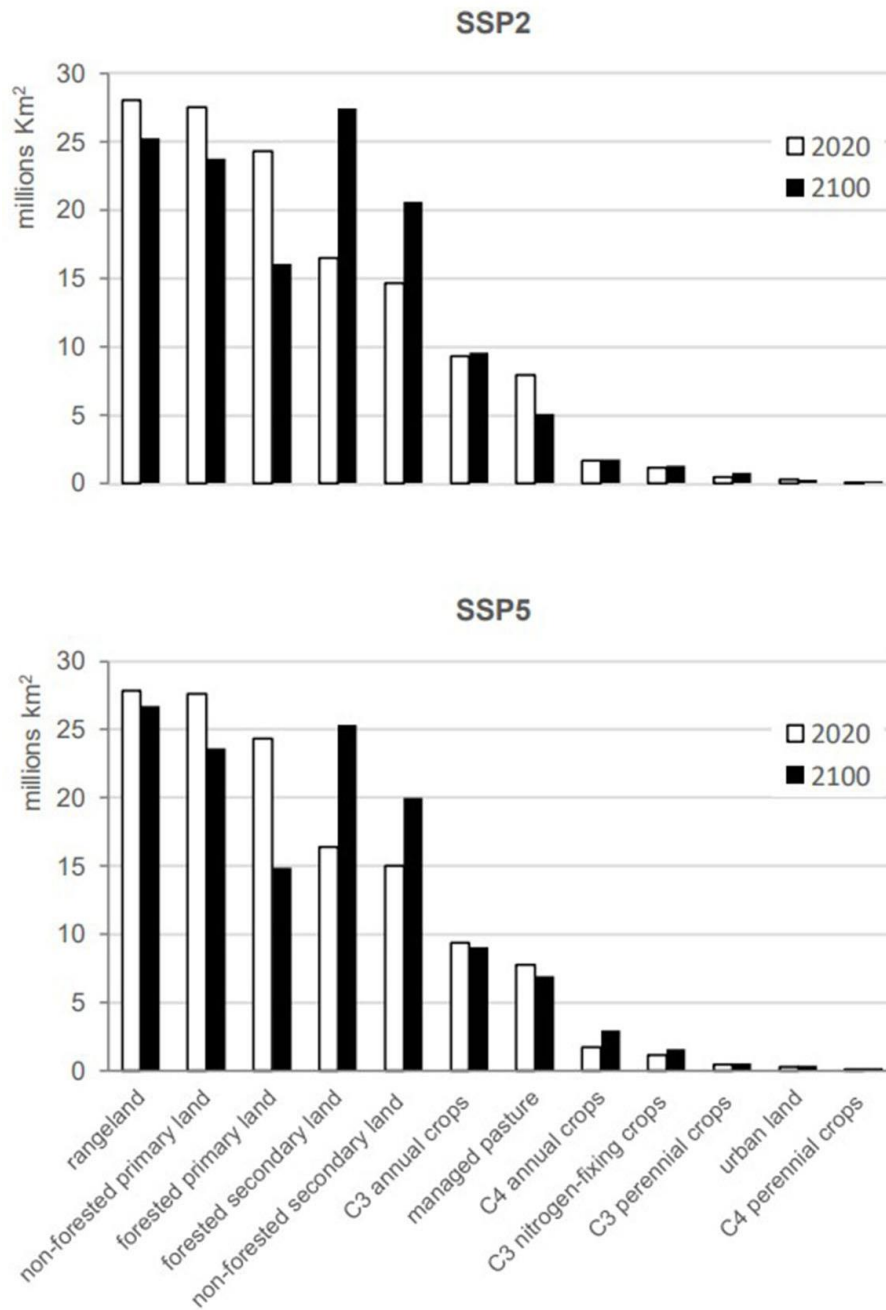

Figure 4. Land-use land cover comparison among years and scenarios. Data for the LULC-files for year 2020 and 2100 for the optimistic (SSP2-4.5, top) and pessimistic (SSP5-8.5, bottom) greenhouse gas scenarios, arranged in decreasing order of class area in 2020.
