# Supplementary material for: GLOBAL LAND-USE AND LAND-COVER DATA: HISTORICAL, CURRENT AND FUTURE SCENARIOS
Source: bioRxiv or medRxiv preprint supplement (doi:10.1101/2021.05.06.442941), 2021-07-20
Supplement: Supplementary file [file media-1.pdf]

## Supplementary Material

Table S1. Reclassification of the reference and target dataset for accuracy assessment analysis. The reference (GLC-SHARE) and classified (LUH2) data were reclassified into four common classes: (1) forest, (2) crops, (3) open areas, and (4) urban. Classes absent in the focus dataset were masked-out.

| original class code | original class name                                 | code (name) after reclassification |
|---------------------|-----------------------------------------------------|------------------------------------|
| GLC-SHARE           |                                                     |                                    |
| 1                   | Artificial surfaces                                 | 4 (urban)                          |
| 2                   | Cropland                                            | 2 (crops)                          |
| 3                   | Grassland                                           | 3 (open areas)                     |
| 4                   | Tree covered areas                                  | 1 (forest)                         |
| 5                   | Shrubs covered areas                                | 3 (open areas)                     |
| 6                   | Herbaceous vegetation, aquatic or regularly flooded | 3 (open areas)                     |
| 7                   | Mangroves                                           | 3 (open areas)                     |
| 8                   | Sparse vegetation                                   | 3 (open areas)                     |
| 9                   | Bare soil                                           | 3 (open areas)                     |
| 10                  | Snow and glaciers                                   | masked-out                         |
| 11                  | Water bodies                                        | masked-out                         |
| LUH2                |                                                     |                                    |
| 1                   | C3 Annual Crops (c3ann)                             | 2 (crops)                          |
| 2                   | C3 Nitrogen-Fixing Crops (c3nfx)                    | 2 (crops)                          |
| 3                   | C3 Perennial Crops (c3per)                          | 2 (crops)                          |
| 4                   | C4 Annual Crops (c4ann)                             | 2 (crops)                          |
| 5                   | C4 Perennial Crops (c4per)                          | 2 (crops)                          |
| 6                   | Managed Pasture (pastr)                             | 3 (open areas)                     |
| 7                   | Forested Primary Land (primnf)                      | 1 (forest)                         |
| 8                   | Non-Forested Primary Land (primn)                   | 3 (open areas)                     |
| 9                   | Rangeland (range)                                   | 3 (open areas)                     |
| 10                  | Potentially Forested Secondary Land (secdf)         | 1 (forest)                         |
| 11                  | Potentially Non-Forested Secondary Land (secdn)     | 3 (open areas)                     |
| 12                  | Urban Land (urban)                                  | 4 (urban)                          |

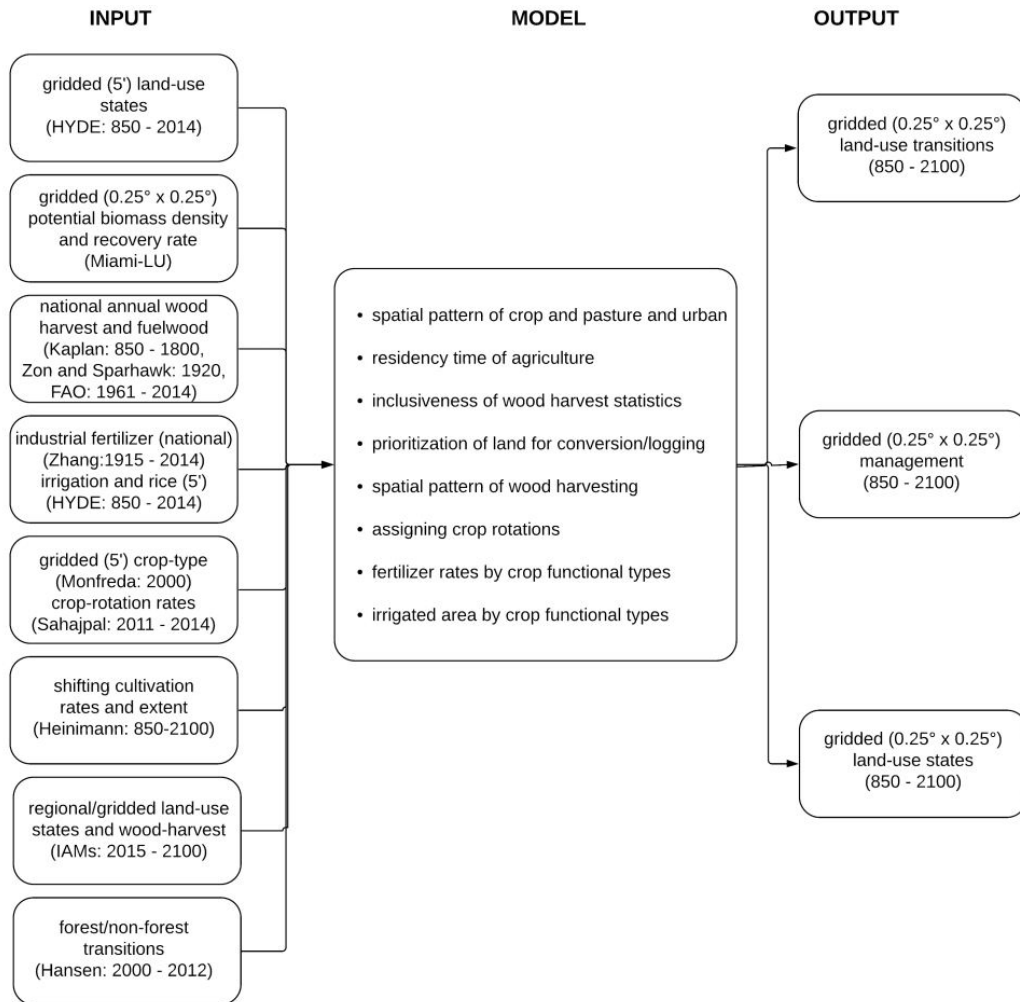

Figure S1. Framework to generate land use and land cover states of Land-Use Harmonization (LUH2, Hurtt et al . 2020)

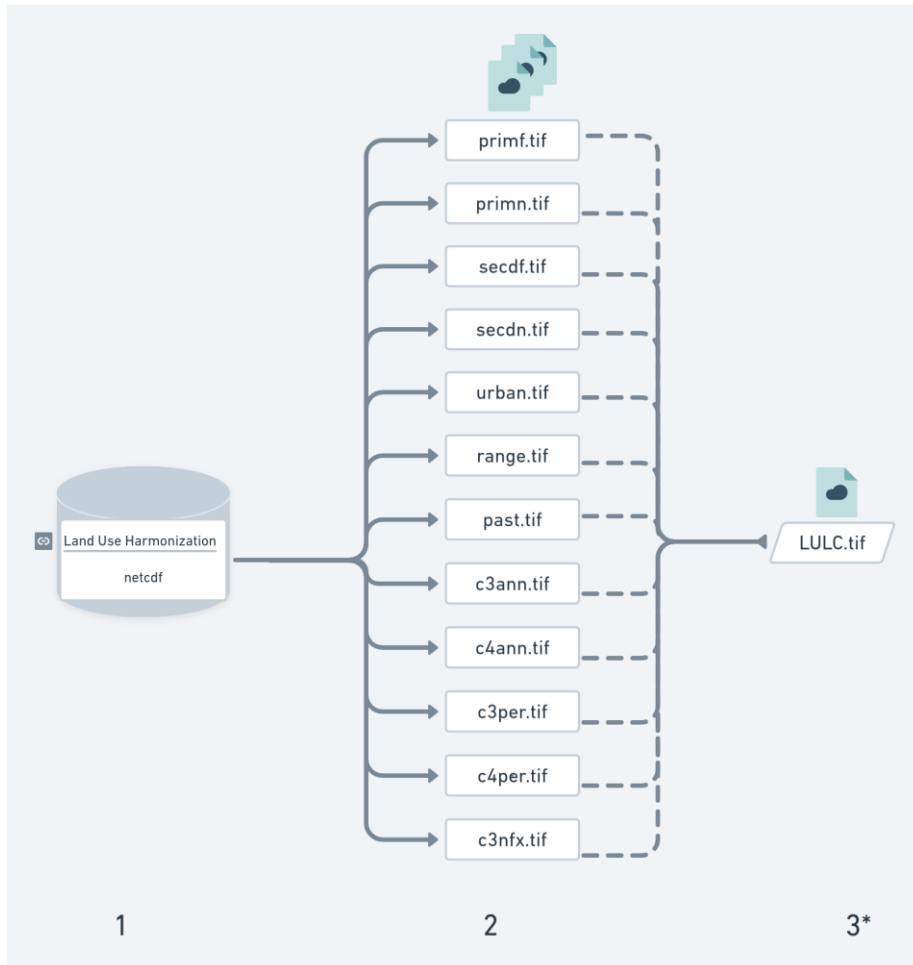

Figure S2. Workflow: 1) Extract every single state (state-files) per year from 850 to 2100, with two future scenarios (SSP2 and SSP5) from 2015 on; 2) Save every state-files (continuous data) in TIFF format; and 3\*) Create new categorical data (LULC-files) of land-use land-cover combining 12 state-files in TIFF format.
